# Supplementary material for: Lipidomic Characterization and Antioxidant Activity of Macro- and Microalgae Blend
Source: MDPI journal article supplement (doi:10.3390/life13010231), 2023-01-13
Supplement: s1 [file s1]

## Supplementary Information

# Lipidomic Characterization and Antioxidant Activity of Macro- And Microalgae Blend

Francisca Marques <sup>1,2</sup>, Diana Lopes <sup>1,2</sup>, Tiago Conde <sup>1,2</sup>, Tânia Melo <sup>1,2</sup>, Joana Silva <sup>3</sup>, Maria Helena Abreu <sup>4</sup>, Pedro Domingues <sup>2</sup> and Maria Rosário Domingues <sup>1,2,\*</sup>

<sup>1</sup> CESAM—Centre for Environmental and Marine Studies, Department of Chemistry, University of Aveiro, Santiago University Campus, 3810-193 Aveiro, Portugal

<sup>2</sup> Mass Spectrometry Centre, LAQV-REQUIMTE, Department of Chemistry, University of Aveiro, Santiago University Campus, 3810-193 Aveiro, Portugal

<sup>3</sup> Allmicroalgae Natural Products S.A., R&D Department, Rua 25 de Abril 19, 2445-287 Pataias, Portugal

<sup>4</sup> ALGAplus—Production and Trading of Seaweed and Derived Products Ltd., 3830-196 Ílhavo, Portugal

\* Correspondence: mrd@ua.pt

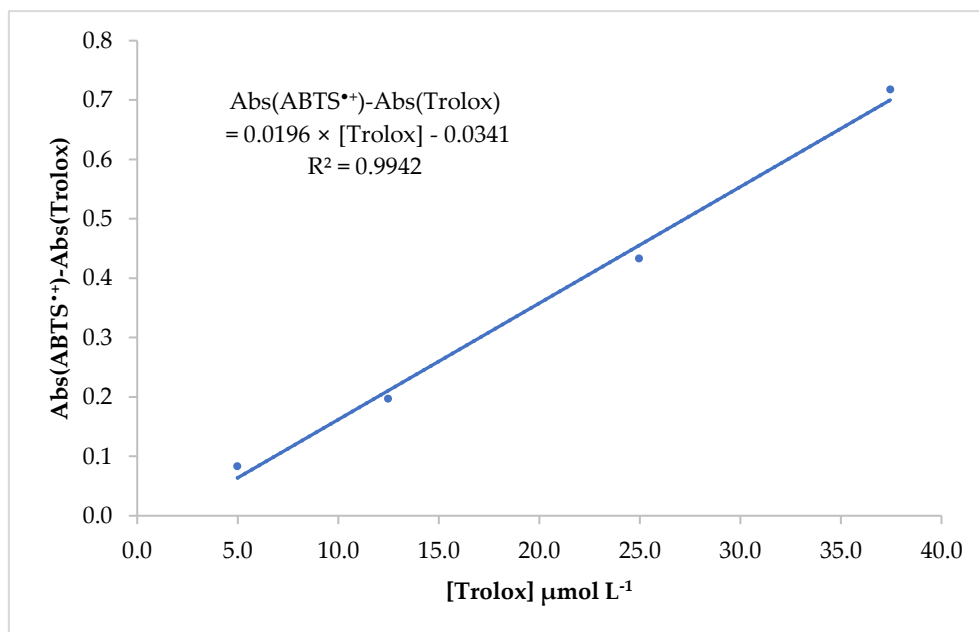

**Figure S1.** Calibration curve for the ABTS<sup>•+</sup> scavenging assay as generated by measuring the absorbance of the reaction medium at 734 nm after 120 min. Trolox was used as standard.

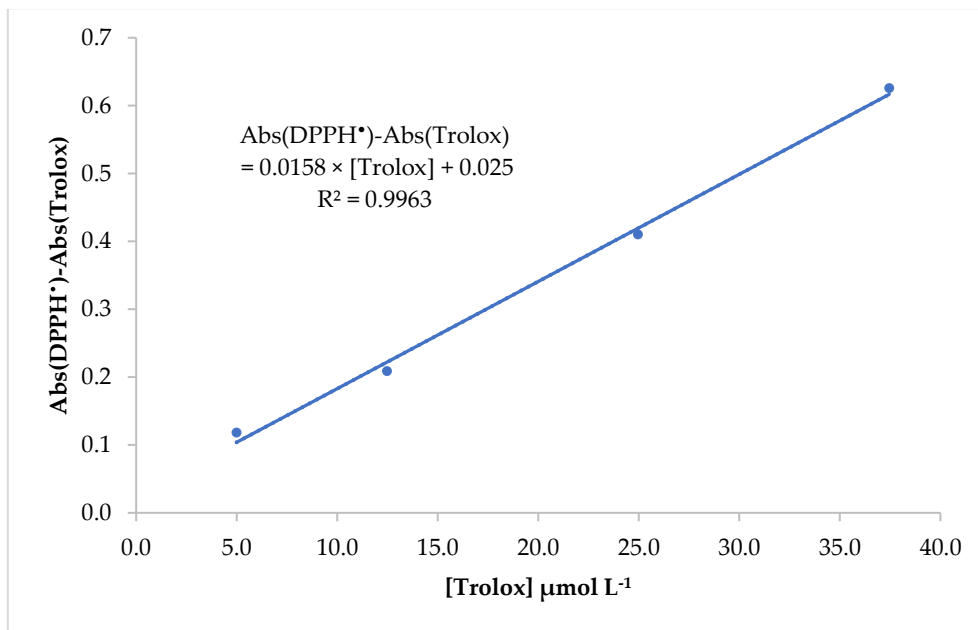

**Figure S2.** Calibration curve for the DPPH• scavenging assay as generated by measuring the absorbance of the reaction medium at 517 nm after 120 min. Trolox was used as standard.

**Table S1.** Glycolipids identified in the polar lipidome of the algae blend (BLEND) by high resolution HILIC–ESI–MS and MS/MS. C carbons, N number of double bonds. \*Lipid species identified based on the polar head fragment, calculated mass and retention time. \*\*Lipid species identified based on calculated mass and retention time.

| Lipid species (C:N)                                      | Calculated <i>m/z</i> | Observed <i>m/z</i> | Error (ppm) | Fatty acyl chains (C:N)               | Formula                                           |
|----------------------------------------------------------|-----------------------|---------------------|-------------|---------------------------------------|---------------------------------------------------|
| <b>MGDG identified as [M+NH<sub>4</sub>]<sup>+</sup></b> |                       |                     |             |                                       |                                                   |
| MGDG 30:4                                                | 712.5000              | 712.4980            | -2.77       | **                                    | C <sub>39</sub> H <sub>70</sub> O <sub>10</sub> N |
| MGDG 32:1                                                | 746.5782              | 746.5765            | -2.30       | **                                    | C <sub>41</sub> H <sub>80</sub> O <sub>10</sub> N |
| MGDG 32:2                                                | 744.5626              | 744.5604            | -2.92       | **                                    | C <sub>41</sub> H <sub>78</sub> O <sub>10</sub> N |
| MGDG 32:3                                                | 742.5469              | 742.5447            | -3.00       | **                                    | C <sub>41</sub> H <sub>76</sub> O <sub>10</sub> N |
| MGDG 32:4                                                | 740.5313              | 740.5289            | -3.20       | **                                    | C <sub>41</sub> H <sub>74</sub> O <sub>10</sub> N |
| MGDG 32:5                                                | 738.5156              | 738.5144            | -1.66       | 16:2_16:3                             | C <sub>41</sub> H <sub>72</sub> O <sub>10</sub> N |
| MGDG 32:6                                                | 736.5000              | 736.4986            | -1.87       | 16:2_16:4 and 16:3/16:3               | C <sub>41</sub> H <sub>70</sub> O <sub>10</sub> N |
| MGDG 34:1                                                | 774.6095              | 774.6058            | -4.81       | **                                    | C <sub>43</sub> H <sub>84</sub> O <sub>10</sub> N |
| MGDG 34:2                                                | 772.5939              | 772.5925            | -1.78       | **                                    | C <sub>43</sub> H <sub>82</sub> O <sub>10</sub> N |
| MGDG 34:3                                                | 770.5782              | 770.5747            | -4.57       | 16:0_18:3 and 16:3_18:0               | C <sub>43</sub> H <sub>80</sub> O <sub>10</sub> N |
| MGDG 34:4                                                | 768.5626              | 768.5607            | -2.44       | 16:1_18:3 and 16:2_18:2 and 16:3_18:1 | C <sub>43</sub> H <sub>78</sub> O <sub>10</sub> N |
| MGDG 34:5                                                | 766.5469              | 766.5441            | -3.68       | **                                    | C <sub>43</sub> H <sub>76</sub> O <sub>10</sub> N |
| MGDG 34:6                                                | 764.5313              | 764.5302            | -1.40       | 16:3_18:3                             | C <sub>43</sub> H <sub>74</sub> O <sub>10</sub> N |
| MGDG 34:8                                                | 760.5000              | 760.4984            | -2.07       | 16:4_18:4                             | C <sub>43</sub> H <sub>70</sub> O <sub>10</sub> N |
| MGDG 34:9                                                | 758.4843              | 758.4871            | 3.66        | *                                     | C <sub>43</sub> H <sub>68</sub> O <sub>10</sub> N |
| MGDG 35:1                                                | 784.5939              | 784.5930            | -1.11       | **                                    | C <sub>44</sub> H <sub>82</sub> O <sub>10</sub> N |
| MGDG 35:6                                                | 778.5464              | 778.5442            | -2.81       | 17:3_18:3                             | C <sub>44</sub> H <sub>72</sub> O <sub>10</sub> N |
| MGDG 36:4                                                | 796.5939              | 796.5921            | -2.23       | 18:1_18:3 and 18:2/18:2               | C <sub>45</sub> H <sub>82</sub> O <sub>10</sub> N |
| MGDG 36:5                                                | 794.5782              | 794.5766            | -2.04       | **                                    | C <sub>45</sub> H <sub>80</sub> O <sub>10</sub> N |
| MGDG 36:6                                                | 792.5626              | 792.5615            | -1.36       | *                                     | C <sub>45</sub> H <sub>78</sub> O <sub>10</sub> N |
| MGDG 36:7                                                | 790.5469              | 790.5487            | 2.25        | **                                    | C <sub>45</sub> H <sub>76</sub> O <sub>10</sub> N |

|                                                          |          |          |       |                                                     |                                                   |
|----------------------------------------------------------|----------|----------|-------|-----------------------------------------------------|---------------------------------------------------|
| MGDG 36:8                                                | 788.5313 | 788.5333 | 2.57  | **                                                  | C <sub>45</sub> H <sub>74</sub> O <sub>10</sub> N |
| MGDG 36:9                                                | 786.5156 | 786.5195 | 4.93  | **                                                  | C <sub>45</sub> H <sub>72</sub> O <sub>10</sub> N |
| MGDG 38:5                                                | 822.6095 | 822.6093 | -0.27 | **                                                  | C <sub>47</sub> H <sub>84</sub> O <sub>10</sub> N |
| MGDG 38:6                                                | 820.5939 | 820.5954 | 1.86  | **                                                  | C <sub>47</sub> H <sub>82</sub> O <sub>10</sub> N |
| MGDG 38:7                                                | 818.5782 | 818.5770 | -1.50 | **                                                  | C <sub>47</sub> H <sub>80</sub> O <sub>10</sub> N |
| MGDG 38:8                                                | 816.5626 | 816.5594 | -3.89 | **                                                  | C <sub>47</sub> H <sub>78</sub> O <sub>10</sub> N |
| MGDG 38:9                                                | 814.5469 | 814.5447 | -2.73 | **                                                  | C <sub>47</sub> H <sub>76</sub> O <sub>10</sub> N |
| MGDG 40:9                                                | 842.5782 | 842.5744 | -4.54 | **                                                  | C <sub>49</sub> H <sub>80</sub> O <sub>10</sub> N |
| <b>MGMG identified as [M+NH<sub>4</sub>]<sup>+</sup></b> |          |          |       |                                                     |                                                   |
| MGMG 16:0                                                | 510.3642 | 510.3633 | -1.78 | **                                                  | C <sub>25</sub> H <sub>52</sub> O <sub>9</sub> N  |
| MGMG 16:1                                                | 508.3486 | 508.3484 | -0.31 | **                                                  | C <sub>25</sub> H <sub>50</sub> O <sub>9</sub> N  |
| MGMG 16:2                                                | 506.3329 | 506.3328 | -0.22 | **                                                  | C <sub>25</sub> H <sub>48</sub> O <sub>9</sub> N  |
| MGMG 16:3                                                | 504.3173 | 504.3172 | -0.12 | **                                                  | C <sub>25</sub> H <sub>46</sub> O <sub>9</sub> N  |
| MGMG 16:4                                                | 502.3016 | 502.3006 | -2.01 | **                                                  | C <sub>25</sub> H <sub>44</sub> O <sub>9</sub> N  |
| MGMG 18:1                                                | 536.3799 | 536.3795 | -0.67 | **                                                  | C <sub>27</sub> H <sub>54</sub> O <sub>9</sub> N  |
| MGMG 18:2                                                | 534.3642 | 534.3642 | -0.02 | **                                                  | C <sub>27</sub> H <sub>52</sub> O <sub>9</sub> N  |
| MGMG 18:3                                                | 532.3486 | 532.3479 | -1.24 | **                                                  | C <sub>27</sub> H <sub>50</sub> O <sub>9</sub> N  |
| MGMG 18:4                                                | 530.3329 | 530.3320 | -1.71 | **                                                  | C <sub>27</sub> H <sub>48</sub> O <sub>9</sub> N  |
| MGMG 20:4                                                | 558.3642 | 558.3630 | -2.17 | **                                                  | C <sub>29</sub> H <sub>52</sub> O <sub>9</sub> N  |
| MGMG 20:5                                                | 556.3486 | 556.3481 | -0.83 | **                                                  | C <sub>29</sub> H <sub>50</sub> O <sub>9</sub> N  |
| <b>DGDG identified as [M+NH<sub>4</sub>]<sup>+</sup></b> |          |          |       |                                                     |                                                   |
| DGDG 28:0                                                | 854.5841 | 854.5833 | -0.93 | *                                                   | C <sub>43</sub> H <sub>84</sub> O <sub>15</sub> N |
| DGDG 30:0                                                | 882.6154 | 882.6153 | -0.11 | *                                                   | C <sub>45</sub> H <sub>88</sub> O <sub>15</sub> N |
| DGDG 32:0                                                | 910.6467 | 910.6476 | 0.99  | **                                                  | C <sub>47</sub> H <sub>92</sub> O <sub>15</sub> N |
| DGDG 32:1                                                | 908.6310 | 908.6297 | -1.48 | 14:0_18:1                                           | C <sub>47</sub> H <sub>90</sub> O <sub>15</sub> N |
| DGDG 32:2                                                | 906.6154 | 906.6156 | 0.22  | 14:0_18:2                                           | C <sub>47</sub> H <sub>88</sub> O <sub>15</sub> N |
| DGDG 32:3                                                | 904.5997 | 904.6006 | 0.94  | 14:0_18:3 and 16:0_16:3                             | C <sub>47</sub> H <sub>86</sub> O <sub>15</sub> N |
| DGDG 32:4                                                | 902.5841 | 902.5836 | -0.55 | 14:0_18:4 and 16:1_16:3 and 16:2/16:2               | C <sub>47</sub> H <sub>84</sub> O <sub>15</sub> N |
| DGDG 32:5                                                | 900.5684 | 900.5676 | -0.94 | 16:2_16:3 and 16:1_16:4                             | C <sub>47</sub> H <sub>82</sub> O <sub>15</sub> N |
| DGDG 34:1                                                | 936.6623 | 936.6602 | -2.29 | 16:0_18:1 and 16:1_18:0                             | C <sub>49</sub> H <sub>94</sub> O <sub>15</sub> N |
| DGDG 34:2                                                | 934.6467 | 934.6447 | -2.14 | 16:0_18:2 and 16:1_18:1 and 17:0_17:2               | C <sub>49</sub> H <sub>92</sub> O <sub>15</sub> N |
| DGDG 34:3                                                | 932.6310 | 932.6294 | -1.77 | 16:0_18:3 and 16:1_18:2 and 16:2_18:1               | C <sub>49</sub> H <sub>90</sub> O <sub>15</sub> N |
| DGDG 34:4                                                | 930.6154 | 930.6140 | -1.50 | 16:0_18:4 and 16:1_18:3 and 16:2_18:2 and 16:3_18:1 | C <sub>49</sub> H <sub>88</sub> O <sub>15</sub> N |
| DGDG 34:5                                                | 928.5997 | 928.5969 | -3.07 | 16:2_18:3 and 16:3_18:2                             | C <sub>49</sub> H <sub>86</sub> O <sub>15</sub> N |
| DGDG 34:6                                                | 926.5841 | 926.5831 | -1.08 | 16:3_18:3                                           | C <sub>49</sub> H <sub>84</sub> O <sub>15</sub> N |
| DGDG 34:7                                                | 924.5684 | 924.5653 | -3.41 | **                                                  | C <sub>49</sub> H <sub>82</sub> O <sub>15</sub> N |
| DGDG 34:8                                                | 922.5528 | 922.5515 | -1.41 | 16:4_18:4                                           | C <sub>49</sub> H <sub>80</sub> O <sub>15</sub> N |
| DGDG 35:1                                                | 950.6780 | 950.6733 | -4.94 | **                                                  | C <sub>50</sub> H <sub>96</sub> O <sub>15</sub> N |
| DGDG 35:2                                                | 948.6623 | 948.6634 | 1.11  | **                                                  | C <sub>50</sub> H <sub>94</sub> O <sub>15</sub> N |
| DGDG 35:3                                                | 946.6467 | 946.6464 | -0.32 | 17:0_18:3                                           | C <sub>50</sub> H <sub>92</sub> O <sub>15</sub> N |
| DGDG 36:1                                                | 964.6936 | 964.6890 | -4.82 | *                                                   | C <sub>51</sub> H <sub>98</sub> O <sub>15</sub> N |
| DGDG 36:2                                                | 962.6780 | 962.6748 | -3.32 | **                                                  | C <sub>51</sub> H <sub>96</sub> O <sub>15</sub> N |
| DGDG 36:3                                                | 960.6623 | 960.6590 | -3.49 | **                                                  | C <sub>51</sub> H <sub>94</sub> O <sub>15</sub> N |
| DGDG 36:4                                                | 958.6467 | 958.6438 | -3.02 | **                                                  | C <sub>51</sub> H <sub>92</sub> O <sub>15</sub> N |
| DGDG 36:5                                                | 956.6310 | 956.6301 | -0.99 | **                                                  | C <sub>51</sub> H <sub>90</sub> O <sub>15</sub> N |
| DGDG 36:6                                                | 954.6154 | 954.6157 | 0.32  | 18:3/18:3                                           | C <sub>51</sub> H <sub>88</sub> O <sub>15</sub> N |
| DGDG 36:7                                                | 952.5997 | 952.6031 | 3.52  | **                                                  | C <sub>51</sub> H <sub>86</sub> O <sub>15</sub> N |
| DGDG 36:8                                                | 950.5841 | 950.5872 | 3.26  | **                                                  | C <sub>51</sub> H <sub>84</sub> O <sub>15</sub> N |
| DGDG 36:9                                                | 948.5684 | 948.5730 | 4.80  | **                                                  | C <sub>51</sub> H <sub>82</sub> O <sub>15</sub> N |
| DGDG 38:5                                                | 984.6623 | 984.6586 | -3.81 | **                                                  | C <sub>53</sub> H <sub>94</sub> O <sub>15</sub> N |

|                                                          |          |          |       |                                       |                                                   |
|----------------------------------------------------------|----------|----------|-------|---------------------------------------|---------------------------------------------------|
| DGDG 38:6                                                | 982.6467 | 982.6450 | -1.73 | 18:1_20:5                             | C <sub>53</sub> H <sub>92</sub> O <sub>15</sub> N |
| DGDG 38:7                                                | 980.6310 | 980.6286 | -2.50 | **                                    | C <sub>53</sub> H <sub>90</sub> O <sub>15</sub> N |
| DGDG 38:8                                                | 978.6154 | 978.6140 | -1.43 | 18:3_20:5                             | C <sub>53</sub> H <sub>88</sub> O <sub>15</sub> N |
| DGDG 38:9                                                | 976.5997 | 976.6000 | 0.26  | **                                    | C <sub>53</sub> H <sub>86</sub> O <sub>15</sub> N |
| <b>DGMG identified as [M+NH<sub>4</sub>]<sup>+</sup></b> |          |          |       |                                       |                                                   |
| DGMG 16:0                                                | 672.4170 | 672.4163 | -1.09 | **                                    | C <sub>31</sub> H <sub>62</sub> O <sub>14</sub> N |
| DGMG 16:1                                                | 670.4014 | 670.4004 | -1.47 | **                                    | C <sub>31</sub> H <sub>60</sub> O <sub>14</sub> N |
| DGMG 16:4                                                | 664.3544 | 664.3538 | -0.95 | **                                    | C <sub>31</sub> H <sub>54</sub> O <sub>14</sub> N |
| DGMG 18:1                                                | 698.4327 | 698.4322 | -0.69 | **                                    | C <sub>33</sub> H <sub>64</sub> O <sub>14</sub> N |
| DGMG 18:2                                                | 696.4170 | 696.4172 | 0.24  | *                                     | C <sub>33</sub> H <sub>62</sub> O <sub>14</sub> N |
| DGMG 18:3                                                | 694.4014 | 694.4015 | 0.17  | **                                    | C <sub>33</sub> H <sub>60</sub> O <sub>14</sub> N |
| DGMG 18:4                                                | 692.3857 | 692.3839 | -2.65 | **                                    | C <sub>33</sub> H <sub>58</sub> O <sub>14</sub> N |
| DGMG 20:5                                                | 718.4014 | 718.4000 | -1.93 | **                                    | C <sub>35</sub> H <sub>60</sub> O <sub>14</sub> N |
| <b>SQDG identified as [M-H]<sup>-</sup></b>              |          |          |       |                                       |                                                   |
| SQDG 28:0                                                | 737.4510 | 737.4519 | 1.25  | 14:0/14:0                             | C <sub>37</sub> H <sub>69</sub> O <sub>12</sub> S |
| SQDG 30:0                                                | 765.4823 | 765.4831 | 1.08  | 14:0_16:0                             | C <sub>39</sub> H <sub>73</sub> O <sub>12</sub> S |
| SQDG 30:1                                                | 763.4666 | 763.4671 | 0.62  | *                                     | C <sub>39</sub> H <sub>71</sub> O <sub>12</sub> S |
| SQDG 30:4                                                | 757.4197 | 757.4215 | 2.41  | 14:0_16:4                             | C <sub>39</sub> H <sub>65</sub> O <sub>12</sub> S |
| SQDG 31:1                                                | 777.4828 | 777.4821 | -0.89 | 15:0_16:1                             | C <sub>40</sub> H <sub>74</sub> O <sub>12</sub> S |
| SQDG 32:0                                                | 793.5136 | 793.5142 | 0.79  | 16:0/16:0                             | C <sub>41</sub> H <sub>77</sub> O <sub>12</sub> S |
| SQDG 32:1                                                | 791.4979 | 791.4987 | 0.98  | 14:0_18:1                             | C <sub>41</sub> H <sub>75</sub> O <sub>12</sub> S |
| SQDG 32:2                                                | 789.4823 | 789.4831 | 1.04  | 14:0_18:2 and 16:0_16:2               | C <sub>41</sub> H <sub>73</sub> O <sub>12</sub> S |
| SQDG 32:3                                                | 787.4666 | 787.4676 | 1.24  | 14:0_18:3 and 16:0_16:3 and 16:1_16:2 | C <sub>41</sub> H <sub>71</sub> O <sub>12</sub> S |
| SQDG 32:4                                                | 785.4510 | 785.4528 | 2.32  | **                                    | C <sub>41</sub> H <sub>69</sub> O <sub>12</sub> S |
| SQDG 33:0                                                | 807.5292 | 807.5259 | -4.12 | **                                    | C <sub>42</sub> H <sub>79</sub> O <sub>12</sub> S |
| SQDG 33:1                                                | 805.5136 | 805.5113 | -2.83 | 14:0_19:1 and 15:0_18:1 and 16:1_17:0 | C <sub>42</sub> H <sub>77</sub> O <sub>12</sub> S |
| SQDG 33:3                                                | 801.4828 | 801.4830 | 0.26  | 15:0_18:3                             | C <sub>42</sub> H <sub>73</sub> O <sub>12</sub> S |
| SQDG 34:0                                                | 821.5449 | 821.5433 | -1.92 | 14:0_20:0 and 16:0_18:0               | C <sub>43</sub> H <sub>81</sub> O <sub>12</sub> S |
| SQDG 34:1                                                | 819.5292 | 819.5302 | 1.19  | 16:0_18:1                             | C <sub>43</sub> H <sub>79</sub> O <sub>12</sub> S |
| SQDG 34:2                                                | 817.5136 | 817.5118 | -2.17 | *                                     | C <sub>43</sub> H <sub>77</sub> O <sub>12</sub> S |
| SQDG 34:3                                                | 815.4979 | 815.4987 | 0.95  | 16:0_18:3                             | C <sub>43</sub> H <sub>75</sub> O <sub>12</sub> S |
| SQDG 34:4                                                | 813.4823 | 813.4834 | 1.38  | 16:0_18:4                             | C <sub>43</sub> H <sub>73</sub> O <sub>12</sub> S |
| SQDG 34:5                                                | 811.4666 | 811.4678 | 1.45  | 16:2_18:3                             | C <sub>43</sub> H <sub>71</sub> O <sub>12</sub> S |
| SQDG 34:6                                                | 809.4510 | 809.4519 | 1.14  | 20:5_24:1                             | C <sub>43</sub> H <sub>69</sub> O <sub>12</sub> S |
| SQDG 36:0                                                | 849.5762 | 849.5737 | -2.92 | *                                     | C <sub>45</sub> H <sub>85</sub> O <sub>12</sub> S |
| SQDG 36:1                                                | 847.5605 | 847.5602 | -0.39 | *                                     | C <sub>45</sub> H <sub>83</sub> O <sub>12</sub> S |
| SQDG 36:2                                                | 845.5449 | 845.5452 | 0.38  | **                                    | C <sub>45</sub> H <sub>81</sub> O <sub>12</sub> S |
| SQDG 36:3                                                | 843.5292 | 843.5280 | -1.45 | **                                    | C <sub>45</sub> H <sub>79</sub> O <sub>12</sub> S |
| SQDG 36:4                                                | 841.5136 | 841.5137 | 0.15  | 18:2_18:2                             | C <sub>45</sub> H <sub>77</sub> O <sub>12</sub> S |
| SQDG 36:5                                                | 839.4979 | 839.4970 | -1.10 | *                                     | C <sub>45</sub> H <sub>75</sub> O <sub>12</sub> S |
| SQDG 36:6                                                | 837.4823 | 837.4830 | 0.86  | 18:3_18:3                             | C <sub>45</sub> H <sub>73</sub> O <sub>12</sub> S |
| SQDG 38:0                                                | 877.6075 | 877.6068 | -0.77 | **                                    | C <sub>47</sub> H <sub>89</sub> O <sub>12</sub> S |
| SQDG 38:1                                                | 875.5918 | 875.5922 | 0.43  | 14:0_24:1 and 16:0_22:1               | C <sub>47</sub> H <sub>87</sub> O <sub>12</sub> S |
| SQDG 38:5                                                | 867.5292 | 867.5301 | 1.01  | **                                    | C <sub>47</sub> H <sub>79</sub> O <sub>12</sub> S |
| SQDG 40:1                                                | 903.6231 | 903.6240 | 0.97  | 16:0_24:1                             | C <sub>49</sub> H <sub>91</sub> O <sub>12</sub> S |
| SQDG 42:1                                                | 931.6544 | 931.6566 | 2.33  | **                                    | C <sub>51</sub> H <sub>95</sub> O <sub>12</sub> S |
| SQDG 42:8                                                | 917.5449 | 917.5426 | -2.48 | **                                    | C <sub>51</sub> H <sub>81</sub> O <sub>12</sub> S |
| SQDG 44:5                                                | 951.6231 | 951.6221 | -1.08 | **                                    | C <sub>53</sub> H <sub>91</sub> O <sub>12</sub> S |
| <b>SQMG identified as [M-H]<sup>-</sup></b>              |          |          |       |                                       |                                                   |
| SQMG 16:0                                                | 555.2839 | 555.2843 | 0.70  | **                                    | C <sub>25</sub> H <sub>47</sub> O <sub>11</sub> S |
| SQMG 16:4                                                | 547.2213 | 547.2230 | 3.08  | **                                    | C <sub>25</sub> H <sub>39</sub> O <sub>11</sub> S |

|           |          |          |       |      |                                                   |
|-----------|----------|----------|-------|------|---------------------------------------------------|
| SQMG 18:1 | 581.2996 | 581.2994 | -0.28 | 18:1 | C <sub>27</sub> H <sub>49</sub> O <sub>11</sub> S |
|-----------|----------|----------|-------|------|---------------------------------------------------|

**Table S2.** Phospholipids identified in the polar lipidome of the algae blend (BLEND) by high resolution HILIC–ESI–MS and MS/MS. C carbons, N number of double bonds. \*Lipid species identified based on the polar head fragment, calculated mass and retention time. \*\*Lipid species identified based on calculated mass and retention time.

| Lipid species (C:N)                 | Calculated <i>m/z</i> | Observed <i>m/z</i> | Error (ppm) | Fatty acyl chains (C:N)                                           | Formula                                           |
|-------------------------------------|-----------------------|---------------------|-------------|-------------------------------------------------------------------|---------------------------------------------------|
| PC identified as [M+H] <sup>+</sup> |                       |                     |             |                                                                   |                                                   |
| PC 30:0                             | 706.5387              | 706.5389            | 0.31        | **                                                                | C <sub>38</sub> H <sub>77</sub> NO <sub>8</sub> P |
| PC 30:3                             | 700.4917              | 700.4890            | -3.90       | **                                                                | C <sub>38</sub> H <sub>71</sub> NO <sub>8</sub> P |
| PC 31:1                             | 718.5381              | 718.5362            | -2.63       | 15:0_16:1 and 15:1_16:0                                           | C <sub>39</sub> H <sub>77</sub> NO <sub>8</sub> P |
| PC 31:3                             | 714.5068              | 714.5067            | -0.10       | 15:0_16:3 and 15:1_16:2                                           | C <sub>39</sub> H <sub>73</sub> NO <sub>8</sub> P |
| PC 31:4                             | 712.4912              | 712.4907            | -0.72       | **                                                                | C <sub>39</sub> H <sub>71</sub> NO <sub>8</sub> P |
| PC 32:0                             | 734.5700              | 734.5679            | -2.83       | **                                                                | C <sub>40</sub> H <sub>81</sub> NO <sub>8</sub> P |
| PC 32:1                             | 732.5543              | 732.5521            | -3.05       | 16:0_16:1                                                         | C <sub>40</sub> H <sub>79</sub> NO <sub>8</sub> P |
| PC 32:2                             | 730.5387              | 730.5370            | -2.30       | 16:0–16:2 and 16:1–16:1 and 14:0–18:2                             | C <sub>40</sub> H <sub>77</sub> NO <sub>8</sub> P |
| PC 32:3                             | 728.5230              | 728.5224            | -0.87       | 16:0_16:3 and 16:1_16:2                                           | C <sub>40</sub> H <sub>75</sub> NO <sub>8</sub> P |
| PC 32:4                             | 726.5074              | 726.5065            | -1.21       | 16:1_16: and 16:2/16:2                                            | C <sub>40</sub> H <sub>73</sub> NO <sub>8</sub> P |
| PC 32:5                             | 724.4917              | 724.4914            | -0.46       | 16:2_16:3                                                         | C <sub>40</sub> H <sub>71</sub> NO <sub>8</sub> P |
| PC 32:6                             | 722.4755              | 722.4753            | -0.30       | 16:3/16:3                                                         | C <sub>40</sub> H <sub>69</sub> NO <sub>8</sub> P |
| PC 33:2                             | 744.5538              | 744.5528            | -1.30       | **                                                                | C <sub>41</sub> H <sub>79</sub> NO <sub>8</sub> P |
| PC 33:3                             | 742.5381              | 742.5381            | 0.01        | 15:0_18:3 and 16:1_17:2 and 16:2_17:1 and 16:3_17:0               | C <sub>41</sub> H <sub>77</sub> NO <sub>8</sub> P |
| PC 33:4                             | 740.5225              | 740.5223            | -0.30       | 16:2_17:2 and 16:3_17:1 and 16:4_17:0                             | C <sub>41</sub> H <sub>75</sub> NO <sub>8</sub> P |
| PC 33:5                             | 738.5068              | 738.5068            | 0.04        | **                                                                | C <sub>41</sub> H <sub>73</sub> NO <sub>8</sub> P |
| PC 33:6                             | 736.4917              | 736.4907            | -1.40       | 16:3_17:3                                                         | C <sub>41</sub> H <sub>71</sub> NO <sub>8</sub> P |
| PC 34:1                             | 760.5856              | 760.5820            | -4.78       | 16:0_18:1 and 16:1_18:0                                           | C <sub>42</sub> H <sub>83</sub> NO <sub>8</sub> P |
| PC 34:2                             | 758.5700              | 758.5688            | -1.56       | *                                                                 | C <sub>42</sub> H <sub>81</sub> NO <sub>8</sub> P |
| PC 34:3                             | 756.5543              | 756.5535            | -1.10       | 16:0_18:3 and 16:1_18:2 and 16:2_18:1 and 16:3_18:0               | C <sub>42</sub> H <sub>79</sub> NO <sub>8</sub> P |
| PC 34:4                             | 754.5387              | 754.5374            | -1.70       | 16:0_18:4 and 16:1_18:3 and 16:2_18:2 and 16:3_18:1 and 16:4_18:0 | C <sub>42</sub> H <sub>77</sub> NO <sub>8</sub> P |
| PC 34:5                             | 752.5230              | 752.5216            | -1.90       | 16:1_18:4 and 16:2_18:3 and 16:3_18:2                             | C <sub>42</sub> H <sub>75</sub> NO <sub>8</sub> P |
| PC 34:6                             | 750.5074              | 750.5063            | -1.44       | 16:3_18:3                                                         | C <sub>42</sub> H <sub>73</sub> NO <sub>8</sub> P |
| PC 34:7                             | 748.4917              | 748.4904            | -1.78       | **                                                                | C <sub>42</sub> H <sub>71</sub> NO <sub>8</sub> P |
| PC 34:8                             | 746.4761              | 746.4734            | -3.59       | **                                                                | C <sub>42</sub> H <sub>69</sub> NO <sub>8</sub> P |
| PC 34:9                             | 744.4604              | 744.4590            | -1.92       | *                                                                 | C <sub>42</sub> H <sub>67</sub> NO <sub>8</sub> P |
| PC 35:1                             | 774.6013              | 774.5998            | -1.91       | 17:0_18:1                                                         | C <sub>43</sub> H <sub>85</sub> NO <sub>8</sub> P |
| PC 35:2                             | 772.5851              | 772.5842            | -1.14       | 17:0_18:2                                                         | C <sub>43</sub> H <sub>83</sub> NO <sub>8</sub> P |
| PC 35:3                             | 770.5694              | 770.5689            | -0.65       | 17:0_18:3 and 17:1_18:2 and 17:2_18:3                             | C <sub>43</sub> H <sub>81</sub> NO <sub>8</sub> P |
| PC 35:4                             | 768.5538              | 768.5526            | -1.52       | 17:1_18:3 and 17:2_18:2                                           | C <sub>43</sub> H <sub>79</sub> NO <sub>8</sub> P |
| PC 35:5                             | 766.5381              | 766.5367            | -1.81       | 17:2_18:3 and 17:3_18:2                                           | C <sub>43</sub> H <sub>77</sub> NO <sub>8</sub> P |
| PC 35:6                             | 764.5225              | 764.5212            | -1.73       | **                                                                | C <sub>43</sub> H <sub>75</sub> NO <sub>8</sub> P |
| PC 35:7                             | 762.5068              | 762.5049            | -2.45       | *                                                                 | C <sub>43</sub> H <sub>73</sub> NO <sub>8</sub> P |
| PC 35:9                             | 758.4755              | 758.4750            | -0.69       | *                                                                 | C <sub>43</sub> H <sub>69</sub> NO <sub>8</sub> P |
| PC 36:2                             | 786.6013              | 786.6020            | 0.91        | 16:1_20:1 and 17:1_19:1 and 18:0_18:2 and 18:1/18:1               | C <sub>44</sub> H <sub>85</sub> NO <sub>8</sub> P |
| PC 36:3                             | 784.5856              | 784.5842            | -1.83       | 18:0_18:3 and 18:1_18:2                                           | C <sub>44</sub> H <sub>83</sub> NO <sub>8</sub> P |
| PC 36:4                             | 782.5700              | 782.5690            | -1.25       | 16:1_20:3 and 16:2_20:2 and 18:1_18:3 and 18:2/18:2               | C <sub>44</sub> H <sub>81</sub> NO <sub>8</sub> P |

|          |          |          |       |                                       |                                                    |
|----------|----------|----------|-------|---------------------------------------|----------------------------------------------------|
| PC 36:5  | 780.5538 | 780.5535 | -0.35 | 16:0_20:5 and 16:1_20:4 and 18:2_18:3 | C <sub>44</sub> H <sub>79</sub> NO <sub>8</sub> P  |
| PC 36:6  | 778.5387 | 778.5372 | -1.90 | 16:3_20:3 and 18:2_18:4 and 18:3/18:3 | C <sub>44</sub> H <sub>77</sub> NO <sub>8</sub> P  |
| PC 36:7  | 776.5230 | 776.5212 | -2.36 | **                                    | C <sub>44</sub> H <sub>75</sub> NO <sub>8</sub> P  |
| PC 36:8  | 774.5074 | 774.5038 | -4.62 | **                                    | C <sub>44</sub> H <sub>73</sub> NO <sub>8</sub> P  |
| PC 36:9  | 772.4917 | 772.4887 | -3.92 | **                                    | C <sub>44</sub> H <sub>71</sub> NO <sub>8</sub> P  |
| PC 37:3  | 798.6007 | 798.6003 | -0.51 | **                                    | C <sub>45</sub> H <sub>85</sub> NO <sub>8</sub> P  |
| PC 37:4  | 796.5851 | 796.5851 | 0.03  | 18:3_19:1                             | C <sub>45</sub> H <sub>83</sub> NO <sub>8</sub> P  |
| PC 38:2  | 814.6326 | 814.6302 | -2.92 | 18:1_20:1 and 18:2_20:0               | C <sub>46</sub> H <sub>89</sub> NO <sub>8</sub> P  |
| PC 38:3  | 812.6169 | 812.6163 | -0.78 | 18:1_20:2 and 18:2_20:1 and 18:3_20:0 | C <sub>46</sub> H <sub>87</sub> NO <sub>8</sub> P  |
| PC 38:4  | 810.6013 | 810.6008 | -0.59 | *                                     | C <sub>46</sub> H <sub>85</sub> NO <sub>8</sub> P  |
| PC 38:5  | 808.5856 | 808.5827 | -3.63 | 18:2_20:3 and 18:3_20:2               | C <sub>46</sub> H <sub>83</sub> NO <sub>8</sub> P  |
| PC 38:6  | 806.5694 | 806.5663 | -3.84 | 18:2_20:4 and 18:3_20:3               | C <sub>46</sub> H <sub>81</sub> NO <sub>8</sub> P  |
| PC 38:7  | 804.5543 | 804.5525 | -2.28 | **                                    | C <sub>46</sub> H <sub>79</sub> NO <sub>8</sub> P  |
| PC 38:8  | 802.5387 | 802.5367 | -2.47 | **                                    | C <sub>46</sub> H <sub>75</sub> NO <sub>8</sub> P  |
| PC 38:9  | 800.5230 | 800.5199 | -3.91 | **                                    | C <sub>46</sub> H <sub>73</sub> NO <sub>8</sub> P  |
| PC 39:9  | 814.5381 | 814.5347 | -4.16 | **                                    | C <sub>47</sub> H <sub>77</sub> NO <sub>8</sub> P  |
| PC 40:6  | 834.6013 | 834.5972 | -4.89 | **                                    | C <sub>48</sub> H <sub>85</sub> NO <sub>8</sub> P  |
| PC 40:7  | 832.5856 | 832.5833 | -2.80 | **                                    | C <sub>48</sub> H <sub>83</sub> NO <sub>8</sub> P  |
| PC 40:8  | 830.5700 | 830.5668 | -3.83 | **                                    | C <sub>48</sub> H <sub>81</sub> NO <sub>8</sub> P  |
| PC 40:9  | 828.5543 | 828.5521 | -2.69 | **                                    | C <sub>48</sub> H <sub>79</sub> NO <sub>8</sub> P  |
| PC 40:10 | 826.5387 | 826.5352 | -4.21 | **                                    | C <sub>48</sub> H <sub>77</sub> NO <sub>8</sub> P  |
| PC 44:2  | 898.7265 | 898.7245 | -2.21 | **                                    | C <sub>52</sub> H <sub>101</sub> NO <sub>8</sub> P |
| PC 44:3  | 896.7108 | 896.7108 | -0.04 | **                                    | C <sub>52</sub> H <sub>99</sub> NO <sub>8</sub> P  |

**LPC identified as [M+H]<sup>+</sup>**

|          |          |          |       |      |                                                   |
|----------|----------|----------|-------|------|---------------------------------------------------|
| LPC 14:0 | 468.3090 | 468.3085 | -1.10 | **   | C <sub>22</sub> H <sub>47</sub> NO <sub>7</sub> P |
| LPC 16:0 | 496.3403 | 496.3395 | -1.64 | 16:0 | C <sub>24</sub> H <sub>51</sub> NO <sub>7</sub> P |
| LPC 16:1 | 494.3247 | 494.3241 | -1.15 | 16:1 | C <sub>24</sub> H <sub>49</sub> NO <sub>7</sub> P |
| LPC 16:2 | 492.3090 | 492.3083 | -1.46 | 16:2 | C <sub>24</sub> H <sub>47</sub> NO <sub>7</sub> P |
| LPC 16:3 | 490.2934 | 490.2925 | -1.77 | 16:3 | C <sub>24</sub> H <sub>45</sub> NO <sub>7</sub> P |
| LPC 17:0 | 510.3554 | 510.3551 | -0.61 | 17:0 | C <sub>25</sub> H <sub>53</sub> NO <sub>7</sub> P |
| LPC 17:1 | 508.3398 | 508.3391 | -1.40 | 17:1 | C <sub>25</sub> H <sub>51</sub> NO <sub>7</sub> P |
| LPC 17:3 | 504.3085 | 504.3075 | -1.98 | 17:3 | C <sub>25</sub> H <sub>47</sub> NO <sub>7</sub> P |
| LPC 18:0 | 524.3716 | 524.3709 | -1.37 | 18:0 | C <sub>26</sub> H <sub>55</sub> NO <sub>7</sub> P |
| LPC 18:1 | 522.3560 | 522.3563 | 0.64  | **   | C <sub>26</sub> H <sub>53</sub> NO <sub>7</sub> P |
| LPC 18:2 | 520.3403 | 520.3400 | -0.61 | 18:2 | C <sub>26</sub> H <sub>51</sub> NO <sub>7</sub> P |
| LPC 18:3 | 518.3247 | 518.3237 | -1.87 | 18:3 | C <sub>26</sub> H <sub>49</sub> NO <sub>7</sub> P |
| LPC 19:1 | 536.3711 | 536.3723 | 2.26  | 19:1 | C <sub>27</sub> H <sub>55</sub> NO <sub>7</sub> P |
| LPC 19:2 | 534.3554 | 534.3546 | -1.52 | 19:2 | C <sub>27</sub> H <sub>53</sub> NO <sub>7</sub> P |
| LPC 20:1 | 550.3873 | 550.3869 | -0.67 | 20:1 | C <sub>28</sub> H <sub>57</sub> NO <sub>7</sub> P |
| LPC 20:2 | 548.3716 | 548.3696 | -3.68 | 20:2 | C <sub>28</sub> H <sub>55</sub> NO <sub>7</sub> P |
| LPC 20:3 | 546.3560 | 546.3536 | -4.33 | **   | C <sub>28</sub> H <sub>53</sub> NO <sub>7</sub> P |
| LPC 20:4 | 544.3398 | 544.3387 | -1.98 | **   | C <sub>28</sub> H <sub>51</sub> NO <sub>7</sub> P |
| LPC 20:5 | 542.3247 | 542.3221 | -4.73 | 20:5 | C <sub>28</sub> H <sub>49</sub> NO <sub>7</sub> P |
| LPC 22:5 | 570.3560 | 570.3542 | -3.10 | **   | C <sub>30</sub> H <sub>53</sub> NO <sub>7</sub> P |
| LPC 22:6 | 568.3403 | 568.3385 | -3.20 | **   | C <sub>30</sub> H <sub>51</sub> NO <sub>7</sub> P |

**PE identified as [M-H]<sup>-</sup>**

|         |          |          |      |                         |                                                   |
|---------|----------|----------|------|-------------------------|---------------------------------------------------|
| PE 28:1 | 632.4291 | 632.4302 | 1.69 | 14:0_14:1               | C <sub>33</sub> H <sub>63</sub> NO <sub>8</sub> P |
| PE 29:0 | 648.4604 | 648.4611 | 1.03 | 14:0_15:0               | C <sub>34</sub> H <sub>67</sub> NO <sub>8</sub> P |
| PE 29:1 | 646.4448 | 646.4456 | 1.27 | 14:1_15:0               | C <sub>34</sub> H <sub>65</sub> NO <sub>8</sub> P |
| PE 30:0 | 662.4761 | 662.4770 | 1.39 | 15:0/15:0               | C <sub>35</sub> H <sub>69</sub> NO <sub>8</sub> P |
| PE 30:1 | 660.4604 | 660.4612 | 1.16 | 14:0_16:1 and 14:1_16:0 | C <sub>35</sub> H <sub>67</sub> NO <sub>8</sub> P |

|                                 |          |          |       |                                       |                                                   |
|---------------------------------|----------|----------|-------|---------------------------------------|---------------------------------------------------|
| PE 30:2                         | 658.4448 | 658.4467 | 2.91  | 14:0_16:2                             | C <sub>35</sub> H <sub>65</sub> NO <sub>8</sub> P |
| PE 30:3                         | 656.4291 | 656.4320 | 4.37  | **                                    | C <sub>35</sub> H <sub>63</sub> NO <sub>8</sub> P |
| PE 31:1                         | 674.4761 | 674.4768 | 1.06  | 15:0_16:1                             | C <sub>36</sub> H <sub>69</sub> NO <sub>8</sub> P |
| PE 31:2                         | 672.4604 | 672.4615 | 1.59  | 15:1_16:1                             | C <sub>36</sub> H <sub>67</sub> NO <sub>8</sub> P |
| PE 31:3                         | 670.4448 | 670.4462 | 2.12  | 15:0_16:3                             | C <sub>36</sub> H <sub>65</sub> NO <sub>8</sub> P |
| PE 32:1                         | 688.4917 | 688.4923 | 0.82  | 16:0_16:1                             | C <sub>37</sub> H <sub>71</sub> NO <sub>8</sub> P |
| PE 32:2                         | 686.4761 | 686.4768 | 1.05  | 16:0_16:2 and 16:1/16:1               | C <sub>37</sub> H <sub>69</sub> NO <sub>8</sub> P |
| PE 32:3                         | 684.4604 | 684.4612 | 1.12  | 14:0_18:3 and 16:0_16:3 and 16:1_16:2 | C <sub>37</sub> H <sub>67</sub> NO <sub>8</sub> P |
| PE 32:4                         | 682.4448 | 682.4463 | 2.22  | 14:1_18:3 and 16:1_16:3 and 16:2/16:2 | C <sub>37</sub> H <sub>65</sub> NO <sub>8</sub> P |
| PE 32:5                         | 680.4291 | 680.4296 | 0.69  | **                                    | C <sub>37</sub> H <sub>63</sub> NO <sub>8</sub> P |
| PE 32:6                         | 678.4135 | 678.4140 | 0.76  | *                                     | C <sub>37</sub> H <sub>61</sub> NO <sub>8</sub> P |
| PE 33:1                         | 702.5074 | 702.5079 | 0.74  | **                                    | C <sub>38</sub> H <sub>73</sub> NO <sub>8</sub> P |
| PE 33:2                         | 700.4917 | 700.4923 | 0.81  | 15:0_18:2 and 16:1_17:1 and 16:2_17:0 | C <sub>38</sub> H <sub>71</sub> NO <sub>8</sub> P |
| PE 33:3                         | 698.4761 | 698.4770 | 1.31  | 15:0_18:3 and 16:3_17:0               | C <sub>38</sub> H <sub>69</sub> NO <sub>8</sub> P |
| PE 34:1                         | 716.5230 | 716.5203 | -3.81 | 16:0_18:1                             | C <sub>39</sub> H <sub>75</sub> NO <sub>8</sub> P |
| PE 34:2                         | 714.5074 | 714.5076 | 0.31  | 16:0_18:2 and 16:1_18:1               | C <sub>39</sub> H <sub>73</sub> NO <sub>8</sub> P |
| PE 34:3                         | 712.4917 | 712.4924 | 0.94  | 16:0_18:3 and 16:1_18:2 and 16:2_18:1 | C <sub>39</sub> H <sub>71</sub> NO <sub>8</sub> P |
| PE 34:4                         | 710.4761 | 710.4767 | 0.87  | 16:1_18:3 and 16:2_18:2 and 16:3_18:1 | C <sub>39</sub> H <sub>69</sub> NO <sub>8</sub> P |
| PE 34:5                         | 708.4604 | 708.4613 | 1.23  | 16:2_18:3 and 16:3_18:2               | C <sub>39</sub> H <sub>67</sub> NO <sub>8</sub> P |
| PE 34:6                         | 706.4448 | 706.4456 | 1.16  | 16:3_18:3                             | C <sub>39</sub> H <sub>65</sub> NO <sub>8</sub> P |
| PE 35:2                         | 728.5230 | 728.5236 | 0.78  | 17:0_18:2 and 17:1_18:1               | C <sub>40</sub> H <sub>75</sub> NO <sub>8</sub> P |
| PE 35:3                         | 726.5074 | 726.5079 | 0.71  | 17:0_18:3 and 17:1_18:2 and 17:2_18:1 | C <sub>40</sub> H <sub>73</sub> NO <sub>8</sub> P |
| PE 35:4                         | 724.4917 | 724.4924 | 0.92  | 17:0_18:4 and 17:1_18:3 and 17:2_18:2 | C <sub>40</sub> H <sub>71</sub> NO <sub>8</sub> P |
| PE 35:5                         | 722.4761 | 722.4765 | 0.58  | 17:2_18:3                             | C <sub>40</sub> H <sub>69</sub> NO <sub>8</sub> P |
| PE 35:6                         | 720.4604 | 720.4610 | 0.79  | 17:3_18:3                             | C <sub>40</sub> H <sub>67</sub> NO <sub>8</sub> P |
| PE 36:2                         | 742.5387 | 742.5387 | 0.02  | 18:0_18:2 and 18:1/18:1               | C <sub>41</sub> H <sub>77</sub> NO <sub>8</sub> P |
| PE 36:3                         | 740.5230 | 740.5227 | -0.45 | **                                    | C <sub>41</sub> H <sub>75</sub> NO <sub>8</sub> P |
| PE 36:4                         | 738.5074 | 738.5090 | 2.19  | 18:1_18:3 and 18:2/18:2               | C <sub>41</sub> H <sub>73</sub> NO <sub>8</sub> P |
| PE 36:5                         | 736.4917 | 736.4923 | 0.77  | *                                     | C <sub>41</sub> H <sub>71</sub> NO <sub>8</sub> P |
| PE 36:6                         | 734.4761 | 734.4769 | 1.11  | 18:3/18:3                             | C <sub>41</sub> H <sub>69</sub> NO <sub>8</sub> P |
| PE 37:3                         | 754.5387 | 754.5374 | -1.70 | 18:2_19:1                             | C <sub>42</sub> H <sub>77</sub> NO <sub>8</sub> P |
| PE 37:4                         | 752.5230 | 752.5234 | 0.49  | 18:3_19:1                             | C <sub>42</sub> H <sub>75</sub> NO <sub>8</sub> P |
| PE 37:5                         | 750.5074 | 750.5075 | 0.16  | 18:3_19:2                             | C <sub>42</sub> H <sub>73</sub> NO <sub>8</sub> P |
| PE 38:2                         | 770.5700 | 770.5696 | -0.50 | 18:1_20:1 and 18:2_20:0               | C <sub>43</sub> H <sub>81</sub> NO <sub>8</sub> P |
| PE 38:3                         | 768.5543 | 768.5545 | 0.22  | 18:1_20:2 and 18:2_20:1 and 18:3_20:0 | C <sub>43</sub> H <sub>79</sub> NO <sub>8</sub> P |
| PE 38:4                         | 766.5387 | 766.5389 | 0.28  | 18:2_20:2 and 18:3_20:1               | C <sub>43</sub> H <sub>77</sub> NO <sub>8</sub> P |
| PE 38:5                         | 764.5230 | 764.5219 | -1.48 | *                                     | C <sub>43</sub> H <sub>75</sub> NO <sub>8</sub> P |
| PE 38:7                         | 760.4917 | 760.4909 | -1.09 | *                                     | C <sub>43</sub> H <sub>71</sub> NO <sub>8</sub> P |
| PE 40:8                         | 786.5074 | 786.5082 | 1.04  | 20:4/20:4                             | C <sub>45</sub> H <sub>73</sub> NO <sub>8</sub> P |
| PE 40:9                         | 784.4917 | 784.4915 | -0.30 | *                                     | C <sub>45</sub> H <sub>71</sub> NO <sub>8</sub> P |
| PE 40:11                        | 780.4604 | 780.4598 | -0.81 | *                                     | C <sub>45</sub> H <sub>67</sub> NO <sub>8</sub> P |
| PE 42:2                         | 826.6326 | 826.6337 | 1.35  | **                                    | C <sub>47</sub> H <sub>89</sub> NO <sub>8</sub> P |
| <b>LPE identified as [M-H]-</b> |          |          |       |                                       |                                                   |
| LPE 14:0                        | 424.2464 | 424.2469 | 1.14  | *                                     | C <sub>19</sub> H <sub>39</sub> NO <sub>7</sub> P |
| LPE 15:0                        | 438.2621 | 438.2626 | 1.22  | *                                     | C <sub>20</sub> H <sub>41</sub> NO <sub>7</sub> P |
| LPE 16:0                        | 452.2777 | 452.2783 | 1.29  | *                                     | C <sub>21</sub> H <sub>43</sub> NO <sub>7</sub> P |
| LPE 16:1                        | 450.2621 | 450.2626 | 1.18  | 16:1                                  | C <sub>21</sub> H <sub>41</sub> NO <sub>7</sub> P |
| LPE 16:2                        | 448.2464 | 448.2470 | 1.30  | **                                    | C <sub>21</sub> H <sub>39</sub> NO <sub>7</sub> P |
| LPE 16:3                        | 446.2308 | 446.2314 | 1.42  | **                                    | C <sub>21</sub> H <sub>37</sub> NO <sub>7</sub> P |
| LPE 17:0                        | 466.2934 | 466.2939 | 1.14  | *                                     | C <sub>22</sub> H <sub>45</sub> NO <sub>7</sub> P |
| LPE 17:1                        | 464.2777 | 464.2780 | 0.61  | 17:1                                  | C <sub>22</sub> H <sub>43</sub> NO <sub>7</sub> P |

|          |          |          |      |      |                                                   |
|----------|----------|----------|------|------|---------------------------------------------------|
| LPE 18:1 | 478.2934 | 478.2940 | 1.32 | 18:1 | C <sub>23</sub> H <sub>45</sub> NO <sub>7</sub> P |
| LPE 18:2 | 476.2777 | 476.2782 | 1.01 | 18:2 | C <sub>23</sub> H <sub>43</sub> NO <sub>7</sub> P |
| LPE 18:3 | 474.2621 | 474.2624 | 0.72 | 18:3 | C <sub>23</sub> H <sub>41</sub> NO <sub>7</sub> P |
| LPE 19:1 | 492.3090 | 492.3097 | 1.39 | 19:1 | C <sub>24</sub> H <sub>47</sub> NO <sub>7</sub> P |
| LPE 20:0 | 508.3403 | 508.3410 | 1.35 | **   | C <sub>25</sub> H <sub>51</sub> NO <sub>7</sub> P |
| LPE 20:1 | 506.3247 | 506.3255 | 1.65 | **   | C <sub>25</sub> H <sub>49</sub> NO <sub>7</sub> P |
| LPE 20:4 | 500.2777 | 500.2784 | 1.37 | 20:4 | C <sub>25</sub> H <sub>43</sub> NO <sub>7</sub> P |
| LPE 20:5 | 498.2621 | 498.2626 | 1.07 | **   | C <sub>25</sub> H <sub>41</sub> NO <sub>7</sub> P |
| LPE 22:1 | 534.3560 | 534.3576 | 3.06 | *    | C <sub>27</sub> H <sub>53</sub> NO <sub>7</sub> P |
| LPE 22:5 | 526.2934 | 526.2938 | 0.82 | *    | C <sub>27</sub> H <sub>45</sub> NO <sub>7</sub> P |

**PG identified as [M-H]<sup>-</sup>**

|          |          |          |       |                                                                      |                                                   |
|----------|----------|----------|-------|----------------------------------------------------------------------|---------------------------------------------------|
| PG 28:1  | 663.4237 | 663.4221 | -2.43 | 14:0_14:1                                                            | C <sub>34</sub> H <sub>64</sub> O <sub>10</sub> P |
| PG 30:0  | 693.4707 | 693.4711 | 0.63  | 14:0_16:0                                                            | C <sub>36</sub> H <sub>70</sub> O <sub>10</sub> P |
| PG 30:1  | 691.4550 | 691.4542 | -1.18 | **                                                                   | C <sub>36</sub> H <sub>68</sub> O <sub>10</sub> P |
| PG 32:0  | 721.5025 | 721.5026 | 0.14  | 16:0/16:0                                                            | C <sub>38</sub> H <sub>74</sub> O <sub>10</sub> P |
| PG 32:1  | 719.4863 | 719.4870 | 0.95  | 16:0_16:1                                                            | C <sub>38</sub> H <sub>72</sub> O <sub>10</sub> P |
| PG 32:2  | 717.4707 | 717.4714 | 1.03  | 16:0_16:2 and 16:1/16:1                                              | C <sub>38</sub> H <sub>70</sub> O <sub>10</sub> P |
| PG 32:3  | 715.4550 | 715.4552 | 0.26  | *                                                                    | C <sub>38</sub> H <sub>68</sub> O <sub>10</sub> P |
| PG 32:4  | 713.4394 | 713.4409 | 2.15  | 14:0_18:3 and 16:1_16:3 and 16:2/16:2                                | C <sub>38</sub> H <sub>66</sub> O <sub>10</sub> P |
| PG 32:5  | 711.4237 | 711.4210 | -3.81 | **                                                                   | C <sub>38</sub> H <sub>64</sub> O <sub>10</sub> P |
| PG 33:0  | 735.5176 | 735.5186 | 1.34  | **                                                                   | C <sub>39</sub> H <sub>77</sub> O <sub>10</sub> P |
| PG 33:1  | 733.5025 | 733.5025 | 0.00  | 15:0_18:1 and 16:0_17:1 and 16:1_17:0                                | C <sub>39</sub> H <sub>74</sub> O <sub>10</sub> P |
| PG 33:2  | 731.4869 | 731.4868 | -0.11 | 15:0_18:2 and 16:0_17:2 and 16:1_17:1                                | C <sub>39</sub> H <sub>72</sub> O <sub>10</sub> P |
| PG 33:3  | 729.4707 | 729.4714 | 1.01  | 15:0_18:3 and 16:3_17:0                                              | C <sub>39</sub> H <sub>70</sub> O <sub>10</sub> P |
| PG 34:0  | 749.5333 | 749.5309 | -3.15 | 14:0_20:0 and 16:0_18:0                                              | C <sub>40</sub> H <sub>78</sub> O <sub>10</sub> P |
| PG 34:1  | 747.5176 | 747.5154 | -2.96 | 16:0_18:1 and 16:1_18:0                                              | C <sub>40</sub> H <sub>76</sub> O <sub>10</sub> P |
| PG 34:2  | 745.5020 | 745.5020 | 0.05  | 16:0_18:2 and 16:1_18:1                                              | C <sub>40</sub> H <sub>74</sub> O <sub>10</sub> P |
| PG 34:3  | 743.4863 | 743.4869 | 0.79  | 16:0_18:3 and 16:1_18:2                                              | C <sub>40</sub> H <sub>72</sub> O <sub>10</sub> P |
| PG 34:4  | 741.4707 | 741.4714 | 0.99  | 14:0_20:4 and 16:0_18:4 and 16:1_18:3<br>and 16:2_18:2               | C <sub>40</sub> H <sub>70</sub> O <sub>10</sub> P |
| PG 34:5  | 739.4556 | 739.4559 | 0.37  | 14:0_20:5 and 16:1_18:4 and 16:2_18:3<br>and 16:3_18:2 and 16:4_18:1 | C <sub>40</sub> H <sub>68</sub> O <sub>10</sub> P |
| PG 35:2  | 759.5182 | 759.5170 | -1.57 | 14:0_21:2 and 17:0_18:2                                              | C <sub>41</sub> H <sub>76</sub> O <sub>10</sub> P |
| PG 35:3  | 757.5025 | 757.5018 | -0.92 | 14:0_21:3 and 17:0_18:3                                              | C <sub>41</sub> H <sub>74</sub> O <sub>10</sub> P |
| PG 35:4  | 755.4869 | 755.4859 | -1.30 | 17:1_18:3                                                            | C <sub>41</sub> H <sub>72</sub> O <sub>10</sub> P |
| PG 35:6  | 751.4556 | 751.4556 | -0.04 | 17:2_18:4                                                            | C <sub>41</sub> H <sub>68</sub> O <sub>10</sub> P |
| PG 36:1  | 775.5489 | 775.5458 | -4.01 | **                                                                   | C <sub>42</sub> H <sub>80</sub> O <sub>10</sub> P |
| PG 36:2  | 773.5333 | 773.5334 | 0.18  | 18:0_18:2 and 18:1/18:1                                              | C <sub>42</sub> H <sub>78</sub> O <sub>10</sub> P |
| PG 36:3  | 771.5176 | 771.5174 | -0.28 | **                                                                   | C <sub>42</sub> H <sub>76</sub> O <sub>10</sub> P |
| PG 36:4  | 769.5020 | 769.5020 | 0.05  | 16:0_20:4 and 16:1_20:3 and 18:1_18:3<br>and 18:2/18:2               | C <sub>42</sub> H <sub>74</sub> O <sub>10</sub> P |
| PG 36:5  | 767.4869 | 767.4860 | -1.12 | **                                                                   | C <sub>42</sub> H <sub>72</sub> O <sub>10</sub> P |
| PG 36:9  | 759.4237 | 759.4227 | -1.33 | *                                                                    | C <sub>42</sub> H <sub>64</sub> O <sub>10</sub> P |
| PG 38:5  | 795.5182 | 795.5207 | 3.19  | 18:1_20:4 and 18:2_20:3 and 18:3_20:2                                | C <sub>44</sub> H <sub>76</sub> O <sub>10</sub> P |
| PG 40:11 | 811.4550 | 811.4561 | 1.34  | *                                                                    | C <sub>46</sub> H <sub>68</sub> O <sub>10</sub> P |
| PG 42:11 | 839.4863 | 839.4862 | -0.13 | *                                                                    | C <sub>48</sub> H <sub>72</sub> O <sub>10</sub> P |
| PG 44:5  | 879.6115 | 879.6088 | -3.08 | **                                                                   | C <sub>50</sub> H <sub>88</sub> O <sub>10</sub> P |
| PG 46:5  | 907.6428 | 907.6429 | 0.10  | **                                                                   | C <sub>52</sub> H <sub>92</sub> O <sub>10</sub> P |

**LPG identified as [M-H]<sup>-</sup>**

|          |          |          |      |      |                                                  |
|----------|----------|----------|------|------|--------------------------------------------------|
| LPG 16:0 | 483.2723 | 483.2744 | 4.35 | 16:0 | C <sub>22</sub> H <sub>44</sub> O <sub>9</sub> P |
| LPG 16:1 | 481.2566 | 481.2571 | 0.94 | *    | C <sub>22</sub> H <sub>42</sub> O <sub>9</sub> P |



|                                           |          |          |       |                                                                      |                                                   |
|-------------------------------------------|----------|----------|-------|----------------------------------------------------------------------|---------------------------------------------------|
| LPG 18:1                                  | 509.2879 | 509.2893 | 2.65  | **                                                                   | C <sub>24</sub> H <sub>46</sub> O <sub>9</sub> P  |
| LPG 18:2                                  | 507.2723 | 507.2732 | 1.78  | **                                                                   | C <sub>24</sub> H <sub>44</sub> O <sub>9</sub> P  |
| LPG 18:3                                  | 505.2566 | 505.2573 | 1.29  | 18:3                                                                 | C <sub>24</sub> H <sub>42</sub> O <sub>9</sub> P  |
| <b>PI identified as [M-H]<sup>-</sup></b> |          |          |       |                                                                      |                                                   |
| PI 30:0                                   | 781.4873 | 781.4844 | -3.65 | **                                                                   | C <sub>39</sub> H <sub>74</sub> O <sub>13</sub> P |
| PI 30:2                                   | 777.4554 | 777.4545 | -1.17 | 14:0_16:2 and 14:1_16:1                                              | C <sub>39</sub> H <sub>70</sub> O <sub>13</sub> P |
| PI 32:3                                   | 803.4711 | 803.4719 | 1.05  | **                                                                   | C <sub>41</sub> H <sub>72</sub> O <sub>13</sub> P |
| PI 34:0                                   | 837.5499 | 837.5458 | -4.84 | **                                                                   | C <sub>43</sub> H <sub>82</sub> O <sub>13</sub> P |
| PI 34:1                                   | 835.5337 | 835.5308 | -3.42 | 16:0_18:1                                                            | C <sub>43</sub> H <sub>80</sub> O <sub>13</sub> P |
| PI 34:2                                   | 833.5180 | 833.5185 | 0.59  | 16:0_18:2 and 16:1_18:1                                              | C <sub>43</sub> H <sub>78</sub> O <sub>13</sub> P |
| PI 34:3                                   | 831.5024 | 831.5037 | 1.61  | 16:0_18:3 and 16:1_18:2                                              | C <sub>43</sub> H <sub>76</sub> O <sub>13</sub> P |
| PI 34:4                                   | 829.4867 | 829.4841 | -3.14 | 16:0_18:4 and 16:1_18:3 and 16:2_18:2                                | C <sub>43</sub> H <sub>74</sub> O <sub>13</sub> P |
| PI 34:5                                   | 827.4711 | 827.4712 | 0.17  | 14:0_20:5 and 16:1_18:4 and 16:2_18:3<br>and 16:3_18:2 and 16:4_18:1 | C <sub>43</sub> H <sub>72</sub> O <sub>13</sub> P |
| PI 35:2                                   | 847.5337 | 847.5334 | -0.30 | 15:0_20:2 and 17:0_18:2                                              | C <sub>44</sub> H <sub>80</sub> O <sub>13</sub> P |
| PI 36:1                                   | 863.5655 | 863.5620 | -4.06 | **                                                                   | C <sub>45</sub> H <sub>84</sub> O <sub>13</sub> P |
| PI 36:2                                   | 861.5493 | 861.5478 | -1.75 | **                                                                   | C <sub>45</sub> H <sub>82</sub> O <sub>13</sub> P |
| PI 36:3                                   | 859.5337 | 859.5336 | -0.07 | 16:0_20:3 and 16:1_20:2 and 16:2_20:1<br>and 18:0_18:3 and 18:2_18:1 | C <sub>45</sub> H <sub>80</sub> O <sub>13</sub> P |
| PI 36:4                                   | 857.5180 | 857.5166 | -1.64 | 16:0_20:4 and 18:0_18:4 and 18:1_18:3<br>and 18:2/18:2               | C <sub>45</sub> H <sub>78</sub> O <sub>13</sub> P |
| PI 36:5                                   | 855.5024 | 855.5034 | 1.22  | 16:0_20:5 and 18:1_18:4 and 18:2_18:3                                | C <sub>45</sub> H <sub>76</sub> O <sub>13</sub> P |
| PI 36:6                                   | 853.4867 | 853.4895 | 3.27  | **                                                                   | C <sub>45</sub> H <sub>74</sub> O <sub>13</sub> P |
| PI 38:4                                   | 885.5493 | 885.5527 | 3.83  | 18:0_20:4 and 18:1_20:3 and 18:2_20:2<br>and 18:3_20:1               | C <sub>47</sub> H <sub>82</sub> O <sub>13</sub> P |
| PI 38:5                                   | 883.5337 | 883.5373 | 4.12  | **                                                                   | C <sub>47</sub> H <sub>80</sub> O <sub>13</sub> P |
| PI 38:8                                   | 877.4873 | 877.4843 | -3.37 | **                                                                   | C <sub>47</sub> H <sub>74</sub> O <sub>13</sub> P |
| PI 40:7                                   | 907.5342 | 907.5305 | -4.08 | **                                                                   | C <sub>49</sub> H <sub>80</sub> O <sub>13</sub> P |
| PI 40:10                                  | 901.4867 | 901.4855 | -1.34 | **                                                                   | C <sub>49</sub> H <sub>74</sub> O <sub>13</sub> P |

**Table S3.** Betaine lipids identified in the polar lipidome of the algae blend (BLEND) by high resolution HILIC-ESI-MS and MS/MS. C carbons, N number of double bonds. \*Lipid species identified based on the polar head fragment, calculated mass and retention time. \*\*Lipid species identified based on calculated mass and retention time.

| Lipid species (C:N)                         | Calculated m/z | Observed m/z | Error (ppm) | Fatty acyl chains (C:N)               | Formula                                          |
|---------------------------------------------|----------------|--------------|-------------|---------------------------------------|--------------------------------------------------|
| <b>DGTS identified as [M+H]<sup>+</sup></b> |                |              |             |                                       |                                                  |
| DGTS 28:0                                   | 656.5465       | 656.5463     | -0.35       | *                                     | C <sub>38</sub> H <sub>74</sub> O <sub>7</sub> N |
| DGTS 30:0                                   | 684.5778       | 684.5781     | 0.40        | 14:0_16:0                             | C <sub>40</sub> H <sub>78</sub> O <sub>7</sub> N |
| DGTS 30:1                                   | 682.5622       | 682.5614     | -1.14       | 14:0_16:1                             | C <sub>40</sub> H <sub>76</sub> O <sub>7</sub> N |
| DGTS 30:3                                   | 678.5309       | 678.5291     | -2.62       | 14:0_16:3                             | C <sub>40</sub> H <sub>72</sub> O <sub>7</sub> N |
| DGTS 30:4                                   | 676.5152       | 676.5144     | -1.23       | **                                    | C <sub>40</sub> H <sub>70</sub> O <sub>7</sub> N |
| DGTS 32:0                                   | 712.6091       | 712.6080     | -1.54       | 16:0/16:0                             | C <sub>42</sub> H <sub>82</sub> O <sub>7</sub> N |
| DGTS 32:1                                   | 710.5935       | 710.5924     | -1.52       | 14:0_18:1 and 16:0_16:1               | C <sub>42</sub> H <sub>80</sub> O <sub>7</sub> N |
| DGTS 32:2                                   | 708.5778       | 708.5768     | -1.45       | 14:0_18:2 and 16:0_16:2 and 16:1/16:1 | C <sub>42</sub> H <sub>78</sub> O <sub>7</sub> N |
| DGTS 32:3                                   | 706.5622       | 706.5599     | -3.23       | *                                     | C <sub>42</sub> H <sub>76</sub> O <sub>7</sub> N |
| DGTS 32:4                                   | 704.5465       | 704.5455     | -1.46       | 14:0_18:4 and 16:0_16:4               | C <sub>42</sub> H <sub>74</sub> O <sub>7</sub> N |
| DGTS 32:6                                   | 700.5152       | 700.5140     | -1.75       | **                                    | C <sub>42</sub> H <sub>70</sub> O <sub>7</sub> N |
| DGTS 33:1                                   | 724.6091       | 724.6093     | 0.24        | 16:0_17:1                             | C <sub>43</sub> H <sub>82</sub> O <sub>7</sub> N |
| DGTS 33:2                                   | 722.5935       | 722.5925     | -1.35       | 16:0_17:2                             | C <sub>43</sub> H <sub>80</sub> O <sub>7</sub> N |
| DGTS 33:3                                   | 720.5778       | 720.5790     | 1.63        | 15:0_18:3                             | C <sub>43</sub> H <sub>78</sub> O <sub>7</sub> N |

|                                             |          |          |       |                                       |                                                  |
|---------------------------------------------|----------|----------|-------|---------------------------------------|--------------------------------------------------|
| DGTS 33:4                                   | 718.5622 | 718.5612 | -1.36 | 15:0_18:4                             | C <sub>43</sub> H <sub>76</sub> O <sub>7</sub> N |
| DGTS 34:1                                   | 738.6248 | 738.6232 | -2.14 | 16:0_18:1                             | C <sub>44</sub> H <sub>84</sub> O <sub>7</sub> N |
| DGTS 34:2                                   | 736.6091 | 736.6066 | -3.43 | 16:0_18:2 and 16:1_18:1               | C <sub>44</sub> H <sub>82</sub> O <sub>7</sub> N |
| DGTS 34:3                                   | 734.5935 | 734.5915 | -2.69 | 16:0_18:3                             | C <sub>44</sub> H <sub>80</sub> O <sub>7</sub> N |
| DGTS 34:4                                   | 732.5778 | 732.5768 | -1.40 | 16:0_18:4                             | C <sub>44</sub> H <sub>78</sub> O <sub>7</sub> N |
| DGTS 34:5                                   | 730.5622 | 730.5608 | -1.89 | 16:1_18:4 and 16:2_18:3               | C <sub>44</sub> H <sub>76</sub> O <sub>7</sub> N |
| DGTS 34:6                                   | 728.5465 | 728.5463 | -0.31 | *                                     | C <sub>44</sub> H <sub>74</sub> O <sub>7</sub> N |
| DGTS 34:7                                   | 726.5309 | 726.5286 | -3.14 | 16:4_18:3                             | C <sub>44</sub> H <sub>72</sub> O <sub>7</sub> N |
| DGTS 34:8                                   | 724.5152 | 724.5159 | 0.93  | 16:4_18:4                             | C <sub>44</sub> H <sub>70</sub> O <sub>7</sub> N |
| DGTS 35:4                                   | 746.5935 | 746.5931 | -0.51 | 15:0_20:4 and 17:1_18:3               | C <sub>45</sub> H <sub>80</sub> O <sub>7</sub> N |
| DGTS 35:5                                   | 744.5778 | 744.5763 | -2.05 | 17:1_18:4                             | C <sub>45</sub> H <sub>78</sub> O <sub>7</sub> N |
| DGTS 36:1                                   | 766.6561 | 766.6528 | -4.28 | 16:0_20:1 and 18:0_18:1               | C <sub>46</sub> H <sub>88</sub> O <sub>7</sub> N |
| DGTS 36:2                                   | 764.6404 | 764.6399 | -0.69 | 16:0_20:2 and 18:1/18:1               | C <sub>46</sub> H <sub>86</sub> O <sub>7</sub> N |
| DGTS 36:3                                   | 762.6248 | 762.6231 | -2.20 | 16:0_20:3                             | C <sub>46</sub> H <sub>84</sub> O <sub>7</sub> N |
| DGTS 36:4                                   | 760.6091 | 760.6069 | -2.93 | 16:0_20:4 and 18:1_18:3               | C <sub>46</sub> H <sub>82</sub> O <sub>7</sub> N |
| DGTS 36:5                                   | 758.5935 | 758.5923 | -1.55 | 16:0_20:5 and 18:1_18:4 and 18:2_18:3 | C <sub>46</sub> H <sub>80</sub> O <sub>7</sub> N |
| DGTS 36:6                                   | 756.5778 | 756.5743 | -4.66 | 18:3/18:3                             | C <sub>46</sub> H <sub>78</sub> O <sub>7</sub> N |
| DGTS 36:7                                   | 754.5622 | 754.5594 | -3.68 | 18:3_18:4                             | C <sub>46</sub> H <sub>76</sub> O <sub>7</sub> N |
| DGTS 36:8                                   | 752.5465 | 752.5452 | -1.77 | 18:4/18:4                             | C <sub>46</sub> H <sub>74</sub> O <sub>7</sub> N |
| DGTS 36:9                                   | 750.5309 | 750.5328 | 2.56  | **                                    | C <sub>46</sub> H <sub>72</sub> O <sub>7</sub> N |
| DGTS 36:10                                  | 748.5152 | 748.5142 | -1.37 | *                                     | C <sub>46</sub> H <sub>70</sub> O <sub>7</sub> N |
| DGTS 38:0                                   | 796.7030 | 796.7023 | -0.92 | **                                    | C <sub>48</sub> H <sub>94</sub> O <sub>7</sub> N |
| DGTS 38:1                                   | 794.6874 | 794.6881 | 0.91  | 18:1_20:0                             | C <sub>48</sub> H <sub>92</sub> O <sub>7</sub> N |
| DGTS 38:3                                   | 790.6561 | 790.6542 | -2.38 | *                                     | C <sub>48</sub> H <sub>88</sub> O <sub>7</sub> N |
| DGTS 38:5                                   | 786.6248 | 786.6238 | -1.24 | 16:0_22:5                             | C <sub>48</sub> H <sub>84</sub> O <sub>7</sub> N |
| DGTS 38:6                                   | 784.6091 | 784.6072 | -2.46 | 16:0_22:5                             | C <sub>48</sub> H <sub>82</sub> O <sub>7</sub> N |
| DGTS 38:7                                   | 782.5935 | 782.5901 | -4.32 | **                                    | C <sub>48</sub> H <sub>80</sub> O <sub>7</sub> N |
| DGTS 38:8                                   | 780.5778 | 780.5744 | -4.39 | 18:4_20:4                             | C <sub>48</sub> H <sub>78</sub> O <sub>7</sub> N |
| DGTS 38:9                                   | 778.5622 | 778.5592 | -3.83 | 18:4_20:5                             | C <sub>48</sub> H <sub>76</sub> O <sub>7</sub> N |
| DGTS 38:10                                  | 776.5465 | 776.5439 | -3.39 | *                                     | C <sub>48</sub> H <sub>74</sub> O <sub>7</sub> N |
| DGTS 40:3                                   | 818.6874 | 818.6850 | -2.91 | **                                    | C <sub>50</sub> H <sub>92</sub> O <sub>7</sub> N |
| DGTS 40:4                                   | 816.6717 | 816.6710 | -0.89 | 16:0_24:4 and 18:4_22:0               | C <sub>50</sub> H <sub>90</sub> O <sub>7</sub> N |
| DGTS 40:5                                   | 814.6561 | 814.6525 | -4.39 | **                                    | C <sub>50</sub> H <sub>88</sub> O <sub>7</sub> N |
| DGTS 40:6                                   | 812.6404 | 812.6402 | -0.28 | 18:1_22:5                             | C <sub>50</sub> H <sub>86</sub> O <sub>7</sub> N |
| DGTS 40:7                                   | 810.6248 | 810.6229 | -2.32 | **                                    | C <sub>50</sub> H <sub>84</sub> O <sub>7</sub> N |
| DGTS 40:8                                   | 808.6091 | 808.6066 | -3.13 | 18:3_22:5                             | C <sub>50</sub> H <sub>82</sub> O <sub>7</sub> N |
| DGTS 40:9                                   | 806.5935 | 806.5920 | -1.83 | 18:4_22:5                             | C <sub>50</sub> H <sub>80</sub> O <sub>7</sub> N |
| DGTS 40:10                                  | 804.5778 | 804.5748 | -3.76 | 20:5/20:5                             | C <sub>50</sub> H <sub>78</sub> O <sub>7</sub> N |
| DGTS 42:5                                   | 842.6874 | 842.6879 | 0.62  | **                                    | C <sub>52</sub> H <sub>92</sub> O <sub>7</sub> N |
| DGTS 42:6                                   | 840.6717 | 840.6688 | -3.48 | **                                    | C <sub>52</sub> H <sub>90</sub> O <sub>7</sub> N |
| DGTS 42:7                                   | 838.6561 | 838.6531 | -3.55 | 20:3_22:4                             | C <sub>52</sub> H <sub>88</sub> O <sub>7</sub> N |
| DGTS 42:9                                   | 834.6248 | 834.6230 | -2.13 | **                                    | C <sub>52</sub> H <sub>84</sub> O <sub>7</sub> N |
| DGTS 42:10                                  | 832.6091 | 832.6071 | -2.44 | **                                    | C <sub>52</sub> H <sub>82</sub> O <sub>7</sub> N |
| DGTS 42:11                                  | 830.5935 | 830.5905 | -3.59 | **                                    | C <sub>54</sub> H <sub>98</sub> O <sub>7</sub> N |
| DGTS 44:5                                   | 870.7187 | 870.7184 | -0.32 | 22:0_22:5                             | C <sub>54</sub> H <sub>96</sub> O <sub>7</sub> N |
| DGTS 44:10                                  | 860.6404 | 860.6385 | -2.24 | 22:5_22:5                             | C <sub>54</sub> H <sub>86</sub> O <sub>7</sub> N |
| DGTS 44:12                                  | 856.6091 | 856.6055 | -4.24 | **                                    | C <sub>54</sub> H <sub>82</sub> O <sub>7</sub> N |
| <b>MGTS identified as [M+H]<sup>+</sup></b> |          |          |       |                                       |                                                  |
| MGTS 14:0                                   | 446.3482 | 446.3472 | -2.16 | 14:0                                  | C <sub>24</sub> H <sub>48</sub> O <sub>6</sub> N |
| MGTS 15:0                                   | 460.3638 | 460.3635 | -0.68 | *                                     | C <sub>25</sub> H <sub>50</sub> O <sub>6</sub> N |
| MGTS 16:0                                   | 474.3795 | 474.3788 | -1.40 | *                                     | C <sub>26</sub> H <sub>52</sub> O <sub>6</sub> N |

|           |          |          |       |      |                                                  |
|-----------|----------|----------|-------|------|--------------------------------------------------|
| MGTS 16:1 | 472.3638 | 472.3633 | -1.09 | *    | C <sub>26</sub> H <sub>50</sub> O <sub>6</sub> N |
| MGTS 16:2 | 470.3482 | 470.3478 | -0.77 | *    | C <sub>26</sub> H <sub>48</sub> O <sub>6</sub> N |
| MGTS 16:3 | 468.3325 | 468.3343 | 3.81  | *    | C <sub>26</sub> H <sub>46</sub> O <sub>6</sub> N |
| MGTS 16:4 | 466.3169 | 466.3162 | -1.42 | *    | C <sub>26</sub> H <sub>44</sub> O <sub>6</sub> N |
| MGTS 17:1 | 486.3795 | 486.3787 | -1.57 | *    | C <sub>27</sub> H <sub>52</sub> O <sub>6</sub> N |
| MGTS 17:3 | 482.3482 | 482.3462 | -4.07 | *    | C <sub>27</sub> H <sub>48</sub> O <sub>6</sub> N |
| MGTS 18:0 | 502.4108 | 502.4091 | -3.31 | *    | C <sub>28</sub> H <sub>56</sub> O <sub>6</sub> N |
| MGTS 18:1 | 500.3951 | 500.3941 | -2.03 | *    | C <sub>28</sub> H <sub>54</sub> O <sub>6</sub> N |
| MGTS 18:2 | 498.3795 | 498.3800 | 1.08  | *    | C <sub>28</sub> H <sub>52</sub> O <sub>6</sub> N |
| MGTS 18:3 | 496.3638 | 496.3613 | -4.98 | 18:3 | C <sub>28</sub> H <sub>50</sub> O <sub>6</sub> N |
| MGTS 18:4 | 494.3482 | 494.3473 | -1.75 | 18:4 | C <sub>28</sub> H <sub>48</sub> O <sub>6</sub> N |
| MGTS 18:5 | 492.3325 | 492.3317 | -1.65 | 18:5 | C <sub>28</sub> H <sub>46</sub> O <sub>6</sub> N |
| MGTS 19:1 | 514.4108 | 514.4115 | 1.43  | *    | C <sub>29</sub> H <sub>56</sub> O <sub>6</sub> N |
| MGTS 20:0 | 530.4421 | 530.4423 | 0.44  | *    | C <sub>30</sub> H <sub>60</sub> O <sub>6</sub> N |
| MGTS 20:1 | 528.4264 | 528.4255 | -1.73 | *    | C <sub>30</sub> H <sub>58</sub> O <sub>6</sub> N |
| MGTS 20:3 | 524.3951 | 524.3933 | -3.46 | *    | C <sub>30</sub> H <sub>54</sub> O <sub>6</sub> N |
| MGTS 20:4 | 522.3795 | 522.3785 | -1.85 | *    | C <sub>30</sub> H <sub>52</sub> O <sub>6</sub> N |
| MGTS 20:5 | 520.3638 | 520.3624 | -2.72 | *    | C <sub>30</sub> H <sub>50</sub> O <sub>6</sub> N |
| MGTS 22:0 | 558.4734 | 558.4726 | -1.37 | *    | C <sub>32</sub> H <sub>64</sub> O <sub>6</sub> N |
| MGTS 22:1 | 556.4577 | 556.4596 | 3.39  | *    | C <sub>32</sub> H <sub>62</sub> O <sub>6</sub> N |
| MGTS 22:3 | 552.4264 | 552.4252 | -2.20 | *    | C <sub>32</sub> H <sub>58</sub> O <sub>6</sub> N |
| MGTS 22:4 | 550.4108 | 550.4095 | -2.30 | **   | C <sub>32</sub> H <sub>56</sub> O <sub>6</sub> N |
| MGTS 22:5 | 548.3951 | 548.3944 | -1.30 | *    | C <sub>32</sub> H <sub>54</sub> O <sub>6</sub> N |
| MGTS 22:6 | 546.3795 | 546.3782 | -2.31 | *    | C <sub>32</sub> H <sub>52</sub> O <sub>6</sub> N |
| MGTS 24:0 | 586.5047 | 586.5038 | -1.47 | *    | C <sub>34</sub> H <sub>68</sub> O <sub>6</sub> N |

**DGTA identified as [M+H]<sup>+</sup>**

|           |          |          |       |                         |                                                  |
|-----------|----------|----------|-------|-------------------------|--------------------------------------------------|
| DGTA 28:0 | 656.5465 | 656.5463 | -0.35 | 14:0/14:0               | C <sub>38</sub> H <sub>74</sub> O <sub>7</sub> N |
| DGTA 28:1 | 654.5309 | 654.5305 | -0.58 | **                      | C <sub>38</sub> H <sub>72</sub> O <sub>7</sub> N |
| DGTA 30:0 | 684.5778 | 684.5772 | -0.92 | 14:0_16:0               | C <sub>40</sub> H <sub>78</sub> O <sub>7</sub> N |
| DGTA 30:1 | 682.5622 | 682.5616 | -0.85 | **                      | C <sub>40</sub> H <sub>76</sub> O <sub>7</sub> N |
| DGTA 30:3 | 678.5309 | 678.5291 | -2.62 | **                      | C <sub>40</sub> H <sub>72</sub> O <sub>7</sub> N |
| DGTA 32:1 | 710.5935 | 710.5924 | -1.52 | 14:0_18:1 and 16:0_16:1 | C <sub>42</sub> H <sub>80</sub> O <sub>7</sub> N |
| DGTA 32:2 | 708.5778 | 708.5766 | -1.73 | 14:0_18:2               | C <sub>42</sub> H <sub>78</sub> O <sub>7</sub> N |
| DGTA 32:3 | 706.5622 | 706.5596 | -3.65 | 14:0_18:3               | C <sub>42</sub> H <sub>76</sub> O <sub>7</sub> N |
| DGTA 32:4 | 704.5465 | 704.5455 | -1.46 | 14:0_18:4 and 16:0_16:4 | C <sub>42</sub> H <sub>74</sub> O <sub>7</sub> N |
| DGTA 34:1 | 738.6248 | 738.6232 | -2.14 | 16:0_18:1               | C <sub>44</sub> H <sub>84</sub> O <sub>7</sub> N |
| DGTA 34:2 | 736.6091 | 736.6083 | -1.12 | 16:0_18:2               | C <sub>44</sub> H <sub>82</sub> O <sub>7</sub> N |
| DGTA 34:3 | 734.5935 | 734.5915 | -2.69 | 16:0_18:3               | C <sub>44</sub> H <sub>80</sub> O <sub>7</sub> N |
| DGTA 34:4 | 732.5778 | 732.5768 | -1.40 | 16:0_18:4               | C <sub>44</sub> H <sub>78</sub> O <sub>7</sub> N |
| DGTA 34:5 | 730.5622 | 730.5620 | -0.25 | 16:1_18:4               | C <sub>44</sub> H <sub>76</sub> O <sub>7</sub> N |
| DGTA 34:6 | 728.5465 | 728.5433 | -4.43 | *                       | C <sub>44</sub> H <sub>74</sub> O <sub>7</sub> N |
| DGTA 34:7 | 726.5309 | 726.5305 | -0.52 | **                      | C <sub>44</sub> H <sub>72</sub> O <sub>7</sub> N |
| DGTA 36:1 | 766.6561 | 766.6528 | -4.28 | **                      | C <sub>46</sub> H <sub>88</sub> O <sub>7</sub> N |
| DGTA 36:2 | 764.6404 | 764.6399 | -0.69 | 18:1/18:1               | C <sub>46</sub> H <sub>86</sub> O <sub>7</sub> N |
| DGTA 36:3 | 762.6248 | 762.6219 | -3.78 | **                      | C <sub>46</sub> H <sub>84</sub> O <sub>7</sub> N |
| DGTA 36:4 | 760.6091 | 760.6069 | -2.93 | **                      | C <sub>46</sub> H <sub>82</sub> O <sub>7</sub> N |
| DGTA 36:5 | 758.5935 | 758.5923 | -1.55 | 16:0_20:5               | C <sub>46</sub> H <sub>80</sub> O <sub>7</sub> N |
| DGTA 36:6 | 756.5778 | 756.5761 | -2.29 | **                      | C <sub>46</sub> H <sub>78</sub> O <sub>7</sub> N |
| DGTA 36:7 | 754.5622 | 754.5594 | -3.68 | *                       | C <sub>46</sub> H <sub>76</sub> O <sub>7</sub> N |
| DGTA 36:8 | 752.5465 | 752.5432 | -4.42 | **                      | C <sub>46</sub> H <sub>74</sub> O <sub>7</sub> N |
| DGTA 38:1 | 794.6874 | 794.6881 | 0.91  | **                      | C <sub>48</sub> H <sub>92</sub> O <sub>7</sub> N |

|            |          |          |       |           |                                                  |
|------------|----------|----------|-------|-----------|--------------------------------------------------|
| DGTA 38:5  | 786.6248 | 786.6229 | -2.39 | 18:1_20:4 | C <sub>48</sub> H <sub>84</sub> O <sub>7</sub> N |
| DGTA 38:6  | 784.6091 | 784.6072 | -2.46 | 18:2_20:4 | C <sub>48</sub> H <sub>82</sub> O <sub>7</sub> N |
| DGTA 38:7  | 782.5935 | 782.5913 | -2.78 | *         | C <sub>48</sub> H <sub>80</sub> O <sub>7</sub> N |
| DGTA 38:8  | 780.5778 | 780.5796 | 2.27  | **        | C <sub>48</sub> H <sub>78</sub> O <sub>7</sub> N |
| DGTA 40:6  | 812.6404 | 812.6406 | 0.21  | 18:2_22:4 | C <sub>50</sub> H <sub>86</sub> O <sub>7</sub> N |
| DGTA 40:7  | 810.6248 | 810.6237 | -1.33 | **        | C <sub>50</sub> H <sub>84</sub> O <sub>7</sub> N |
| DGTA 40:8  | 808.6091 | 808.6075 | -2.01 | *         | C <sub>50</sub> H <sub>82</sub> O <sub>7</sub> N |
| DGTA 40:9  | 806.5935 | 806.5912 | -2.83 | *         | C <sub>50</sub> H <sub>80</sub> O <sub>7</sub> N |
| DGTA 40:10 | 804.5778 | 804.5748 | -3.76 | **        | C <sub>50</sub> H <sub>78</sub> O <sub>7</sub> N |
| DGTA 42:5  | 842.6874 | 842.6871 | -0.33 | **        | C <sub>52</sub> H <sub>92</sub> O <sub>7</sub> N |
| DGTA 42:11 | 830.5935 | 830.5896 | -4.67 | **        | C <sub>52</sub> H <sub>80</sub> O <sub>7</sub> N |

---

**MGTA identified as [M+H]<sup>+</sup>**

---

|           |          |          |       |      |                                                  |
|-----------|----------|----------|-------|------|--------------------------------------------------|
| MGTA 14:0 | 446.3482 | 446.3472 | -2.16 | 14:0 | C <sub>24</sub> H <sub>48</sub> O <sub>6</sub> N |
| MGTA 16:0 | 474.3795 | 474.3786 | -1.82 | *    | C <sub>26</sub> H <sub>48</sub> O <sub>6</sub> N |
| MGTA 16:1 | 472.3638 | 472.3632 | -1.30 | *    | C <sub>26</sub> H <sub>50</sub> O <sub>6</sub> N |
| MGTA 18:1 | 500.3951 | 500.3945 | -1.23 | *    | C <sub>28</sub> H <sub>54</sub> O <sub>6</sub> N |
| MGTA 18:2 | 498.3795 | 498.3788 | -1.33 | *    | C <sub>28</sub> H <sub>52</sub> O <sub>6</sub> N |
| MGTA 18:3 | 496.3638 | 496.3620 | -3.65 | 18:3 | C <sub>28</sub> H <sub>50</sub> O <sub>6</sub> N |
| MGTA 18:4 | 494.3482 | 494.3478 | -0.74 | **   | C <sub>28</sub> H <sub>48</sub> O <sub>6</sub> N |
| MGTA 20:1 | 528.4264 | 528.4265 | 0.16  | *    | C <sub>30</sub> H <sub>58</sub> O <sub>6</sub> N |
| MGTA 20:2 | 526.4108 | 526.4101 | -1.26 | **   | C <sub>30</sub> H <sub>56</sub> O <sub>6</sub> N |
| MGTA 20:3 | 524.3951 | 524.3950 | -0.22 | **   | C <sub>30</sub> H <sub>54</sub> O <sub>6</sub> N |
| MGTA 20:4 | 522.3795 | 522.3779 | -2.99 | *    | C <sub>30</sub> H <sub>52</sub> O <sub>6</sub> N |
| MGTA 20:5 | 520.3638 | 520.3630 | -1.56 | **   | C <sub>30</sub> H <sub>50</sub> O <sub>6</sub> N |
| MGTA 22:1 | 556.4577 | 556.4580 | 0.51  | *    | C <sub>32</sub> H <sub>62</sub> O <sub>6</sub> N |

---
